# Supplementary material for: Role of body mass index and weight change in the risk of cancer: A systematic review and meta-analysis of 66 cohort studies
Source: PubMed Central journal article supplement (PMC10978059; doi:10.7189/jogh.14.04067), 2024-03-29

## **ONLINE SUPPLEMENTARY DOCUMENT**

**Title:** Role of body mass index and weight change in the risk of cancer: A systematic review and meta-analysis of 66 cohort studies.

Table S1. PRISMA 2009 Checklist

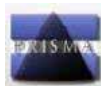

## PRISMA 2009 Checklist

| Section/topic                      | #  | Checklist item                                                                                                                                                                                                                                                                                              | Reported on page # |
|------------------------------------|----|-------------------------------------------------------------------------------------------------------------------------------------------------------------------------------------------------------------------------------------------------------------------------------------------------------------|--------------------|
| <b>TITLE</b>                       |    |                                                                                                                                                                                                                                                                                                             |                    |
| Title                              | 1  | Identify the report as a systematic review, meta-analysis, or both.                                                                                                                                                                                                                                         | 1                  |
| <b>ABSTRACT</b>                    |    |                                                                                                                                                                                                                                                                                                             |                    |
| Structured summary                 | 2  | Provide a structured summary including, as applicable: background; objectives; data sources; study eligibility criteria, participants, and interventions; study appraisal and synthesis methods; results; limitations; conclusions and implications of key findings; systematic review registration number. | 3-4                |
| <b>INTRODUCTION</b>                |    |                                                                                                                                                                                                                                                                                                             |                    |
| Rationale                          | 3  | Describe the rationale for the review in the context of what is already known.                                                                                                                                                                                                                              | 4-6                |
| Objectives                         | 4  | Provide an explicit statement of questions being addressed with reference to participants, interventions, comparisons, outcomes, and study design (PICOS).                                                                                                                                                  | 5-6                |
| <b>METHODS</b>                     |    |                                                                                                                                                                                                                                                                                                             |                    |
| Protocol and registration          | 5  | Indicate if a review protocol exists, if and where it can be accessed (e.g., Web address), and, if available, provide registration information including registration number.                                                                                                                               | 6                  |
| Eligibility criteria               | 6  | Specify study characteristics (e.g., PICOS, length of follow-up) and report characteristics (e.g., years considered, language, publication status) used as criteria for eligibility, giving rationale.                                                                                                      | 7                  |
| Information sources                | 7  | Describe all information sources (e.g., databases with dates of coverage, contact with study authors to identify additional studies) in the search and date last searched.                                                                                                                                  | 6                  |
| Search                             | 8  | Present full electronic search strategy for at least one database, including any limits used, such that it could be repeated.                                                                                                                                                                               | 6                  |
| Study selection                    | 9  | State the process for selecting studies (i.e., screening, eligibility, included in systematic review, and, if applicable, included in the meta-analysis).                                                                                                                                                   | 7                  |
| Data collection process            | 10 | Describe method of data extraction from reports (e.g., piloted forms, independently, in duplicate) and any processes for obtaining and confirming data from investigators.                                                                                                                                  | 7                  |
| Data items                         | 11 | List and define all variables for which data were sought (e.g., PICOS, funding sources) and any assumptions and simplifications made.                                                                                                                                                                       | 7                  |
| Risk of bias in individual studies | 12 | Describe methods used for assessing risk of bias of individual studies (including specification of whether this was done at the study or outcome level), and how this information is to be used in any data synthesis.                                                                                      | 8-9                |
| Summary measures                   | 13 | State the principal summary measures (e.g., risk ratio, difference in means).                                                                                                                                                                                                                               | 7                  |
| Synthesis of results               | 14 | Describe the methods of handling data and combining results of studies, if done, including measures of consistency (e.g., $I^2$ ) for each meta-analysis.                                                                                                                                                   | 7-8                |

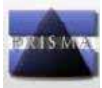

# PRISMA 2009 Checklist

| Section/topic                 | #  | Checklist item                                                                                                                                                                                           | Reported on page # |
|-------------------------------|----|----------------------------------------------------------------------------------------------------------------------------------------------------------------------------------------------------------|--------------------|
| Risk of bias across studies   | 15 | Specify any assessment of risk of bias that may affect the cumulative evidence (e.g., publication bias, selective reporting within studies).                                                             | 8                  |
| Additional analyses           | 16 | Describe methods of additional analyses (e.g., sensitivity or subgroup analyses, meta-regression), if done, indicating which were pre-specified.                                                         | 7-8                |
| <b>RESULTS</b>                |    |                                                                                                                                                                                                          |                    |
| Study selection               | 17 | Give numbers of studies screened, assessed for eligibility, and included in the review, with reasons for exclusions at each stage, ideally with a flow diagram.                                          | 9-10               |
| Study characteristics         | 18 | For each study, present characteristics for which data were extracted (e.g., study size, PICOS, follow-up period) and provide the citations.                                                             | 10-11              |
| Risk of bias within studies   | 19 | Present data on risk of bias of each study and, if available, any outcome level assessment (see item 12).                                                                                                | 11                 |
| Results of individual studies | 20 | For all outcomes considered (benefits or harms), present, for each study: (a) simple summary data for each intervention group (b) effect estimates and confidence intervals, ideally with a forest plot. | 8                  |
| Synthesis of results          | 21 | Present results of each meta-analysis done, including confidence intervals and measures of consistency.                                                                                                  | 9-17               |
| Risk of bias across studies   | 22 | Present results of any assessment of risk of bias across studies (see Item 15).                                                                                                                          | 17                 |
| Additional analysis           | 23 | Give results of additional analyses, if done (e.g., sensitivity or subgroup analyses, meta-regression [see Item 16]).                                                                                    | 12-16              |
| <b>DISCUSSION</b>             |    |                                                                                                                                                                                                          |                    |
| Summary of evidence           | 24 | Summarize the main findings including the strength of evidence for each main outcome; consider their relevance to key groups (e.g., healthcare providers, users, and policy makers).                     | 17-21              |
| Limitations                   | 25 | Discuss limitations at study and outcome level (e.g., risk of bias), and at review-level (e.g., incomplete retrieval of identified research, reporting bias).                                            | 21-22              |
| Conclusions                   | 26 | Provide a general interpretation of the results in the context of other evidence, and implications for future research.                                                                                  | 22-23              |
| <b>FUNDING</b>                |    |                                                                                                                                                                                                          |                    |
| Funding                       | 27 | Describe sources of funding for the systematic review and other support (e.g., supply of data); role of funders for the systematic review.                                                               | 23                 |

From: Moher D, Liberati A, Tetzlaff J, Altman DG, The PRISMA Group (2009). Preferred Reporting Items for Systematic Reviews and Meta-Analyses: The PRISMA Statement. PLoS Med 6(7): e1000097. doi:10.1371/journal.pmed1000097

For more information, visit: [www.prisma-statement.org](http://www.prisma-statement.org).

**Table S2. Search Strategy**

| Database       | Search strategy                                                                                                                                               |
|----------------|---------------------------------------------------------------------------------------------------------------------------------------------------------------|
| Pubmed         | (cancer[Title/Abstract] or carcinoma[Title/Abstract]) AND (risk[Title]) AND (weight[Title/Abstract] or overweight[Title/Abstract] or obesity[Title/Abstract]) |
| Web of Science | (TI=(obesity) OR TI=(overweight) OR TI=(weight)) AND (TI=(carcinoma) OR TI=(cancer)) AND (TI=(risk))                                                          |

Table S3. Characteristics of the studies included in the meta-analysis.

| Study                            | Year | Country or Region    | No. of Participants | Sex (M/F) | Age at entry (years) | Outcome                                         | Study Quality | Included Data Type of Cancer incidence | Figure |   |   | Supplementary Figure |   |   |
|----------------------------------|------|----------------------|---------------------|-----------|----------------------|-------------------------------------------------|---------------|----------------------------------------|--------|---|---|----------------------|---|---|
|                                  |      |                      |                     |           |                      |                                                 |               |                                        | 2      | 3 | 4 | 2                    | 3 | 4 |
| Pasqual E, 2023 <sup>1</sup>     | 2023 | USA                  | 47739               | F         | 35-74                | Thyroid cancer                                  | 8             | Event/Total                            | √      | √ |   |                      |   |   |
| Safizadeh F, 2023 <sup>2</sup>   | 2023 | UK                   | 453049              | M/F       | 40-69                | Colorectal cancer                               | 7             | Event/Total                            | √      | √ |   |                      |   |   |
| Nguyen DN, 2022 <sup>3</sup>     | 2022 | Korea                | 160650              | M/F       | 40-79                | Thyroid Cancer                                  | 8             | Event/Total                            | √      | √ |   |                      |   |   |
| Lee HW, 2022 <sup>4</sup>        | 2022 | Korea                | 134130              | M/F       | 40-69                | Gastric Cancer                                  | 9             | Event/Total                            | √      |   |   |                      |   |   |
| Mao D, 2022 <sup>5</sup>         | 2022 | Hong Kong SAR, China | 15281               | M/F       | NA                   | Liver Cancer                                    | 6             | Event/Total                            | √      | √ |   |                      |   |   |
| Miyata H, 2021 <sup>6</sup>      | 2021 | Japan                | 33,801              | M/F       | 40-79                | Endometrial Cancer                              | 9             | Event/Total                            | √      | √ | √ |                      |   | √ |
| Abe SK, 2021 <sup>7</sup>        | 2021 | Japan                | 92098               | M/F       | 40-69                | Liver Cancer                                    | 8             | Event/Total                            | √      | √ |   |                      |   |   |
| Smith SG, 2021 <sup>8</sup>      | 2021 | United Kingdom       | 10653               | M/F       | 35–70                | Breast Cancer                                   | 8             | Event/Total                            | √      | √ |   |                      |   |   |
| Baumeister SE, 2021 <sup>9</sup> | 2021 | Germany              | 145575              | F         | 50-72                | Ovarian Cancer                                  | 8             | HR                                     |        |   |   |                      |   | √ |
| Maliniak ML, 2021 <sup>10</sup>  | 2021 | USA                  | 43795               | F         | 63.5 (mean)          | Breast Cancer, Endometrial Cancer, Colon Cancer | 9             | Event/Total                            | √      | √ |   |                      |   | √ |
| Sanikini H, 2020 <sup>11</sup>   | 2020 | United Kingdom       | 458713              | M/F       | 40-69                | Esophageal Adenocarcinoma                       | 9             | Event/Total                            | √      | √ |   |                      |   | √ |
| Luo J, 2020 <sup>12</sup>        | 2020 | USA                  | 70379               | F         | 50-79                | Breast Cancer                                   | 9             | Event/Total                            | √      | √ |   |                      |   | √ |
| Minami CA, 2020 <sup>13</sup>    | 2020 | USA                  | 1222                | M/F       | NA                   | Lobular Carcinoma In Situ                       | 4             | HR                                     |        |   |   |                      |   | √ |
| Rehnan AG, 2020 <sup>14</sup>    | 2020 | United Kingdom       | 47042               | F         | 47-73                | Breast Cancer                                   | 8             | Event/Total                            | √      | √ |   |                      |   |   |
| Sanikini H, 2020 <sup>15</sup>   | 2020 | United Kingdom       | 476160              | M/F       | 25-70                | Esophagus Cancer, Gastric Cancer                | 9             | Event/Total                            | √      | √ |   |                      |   | √ |

|                                         |      |                                  |         |     |                  |                                                                                                                                                                                                                                           |   |             |   |   |   |
|-----------------------------------------|------|----------------------------------|---------|-----|------------------|-------------------------------------------------------------------------------------------------------------------------------------------------------------------------------------------------------------------------------------------|---|-------------|---|---|---|
| Everatt R, 2019 <sup>16</sup>           | 2019 | Lithuania                        | 6849    | M   | 45-59            | Kidney Cancer                                                                                                                                                                                                                             | 8 | Event/Total | √ | √ |   |
| Hirabayashi M, 2019 <sup>17</sup>       | 2019 | Japan                            | 92056   | M/F | 40-69            | Gastric Cancer                                                                                                                                                                                                                            | 9 | Event/Total | √ | √ |   |
| Kawachi A, 2019 <sup>18</sup>           | 2019 | Japan                            | 53651   | F   | 40-69            | Endometrial Cancer                                                                                                                                                                                                                        | 9 | Event/Total | √ | √ |   |
| Wakamatsu M, 2019 <sup>19</sup>         | 2019 | Japan                            | 78743   | M/F | 40-79            | Obesity Related Cancer                                                                                                                                                                                                                    | 9 | Event/Total | √ |   |   |
| Zohar L, 2019 <sup>20</sup>             | 2019 | Israel                           | 1794570 | M/F | 16-19            | Pancreatic Cancer                                                                                                                                                                                                                         | 8 | Event/Total | √ | √ | √ |
| Schoemaker MJ,<br>2018 <sup>21</sup>    | 2018 | United Kingdom                   | 758592  | F   | 40-69            | Breast Cancer                                                                                                                                                                                                                             | 8 | Event/Total | √ |   |   |
| Xu HL, 2018 <sup>22</sup>               | 2018 | People's<br>Republic of<br>China | 51004   | M/F | 61.39(mean)      | Stomach, Colorectal,<br>Pancreas, Trachea,<br>Bronchus<br>& Lung, Breast,<br>Prostate , Bladder,<br>Thyroid Cancer                                                                                                                        | 9 | Event/Total | √ | √ | √ |
| Dickerman BA, 2017 <sup>23</sup>        | 2017 | USA                              | 5158    | M   | 40-75            | Prostatic Cancer                                                                                                                                                                                                                          | 9 | Event/Total | √ | √ |   |
| Leiba A, 2017 <sup>24</sup>             | 2017 | Israel                           | 2516256 | M/F | 16-19            | Bone Marrow<br>Proliferative Tumor<br>(MPN)                                                                                                                                                                                               | 7 | HR          |   |   | √ |
| Yamamoto-Honda R,<br>2016 <sup>25</sup> | 2016 | Japan                            | 2334    | M/F | 62.0<br>(median) | Oropharynx,<br>Submandibular Gland,<br>Larynx,<br>Esophageal (Squamous<br>Cell Cancer), Stomach,<br>Duodenum, Colorectal,<br>Liver, Gall Bladder,<br>Biliary Tract, Pancreas,<br>Lung, Breast<br>(Postmenopausal),<br>Endometrial, Ovary, | 9 | Event/Total | √ | √ |   |

Prostate, Kidney, Renal  
Pelvis, Urinary Bladder,  
Hematopoietic, Gastric  
Gastrointestinal Stromal  
Tumor

|                                  |      |                |        |     |           |                                  |   |             |   |   |   |
|----------------------------------|------|----------------|--------|-----|-----------|----------------------------------|---|-------------|---|---|---|
| Sponholtz TR, 2016 <sup>26</sup> | 2016 | USA            | 47557  | F   | 21-69     | Endometrial Cancer               | 9 | Event/Total | √ |   |   |
| White AJ, 2015 <sup>27</sup>     | 2015 | USA            | 50884  | F   | 35-74     | Breast Cancer                    | 9 | Event/Total | √ |   | √ |
| Moller H, 2015 <sup>28</sup>     | 2015 | United Kingdom | 26944  | M   | 50-64     | Prostatic Cancer                 | 8 | Event/Total | √ | √ |   |
| de Mutsert R, 2014 <sup>29</sup> | 2014 | Singapore      | 39909  | M/F | 40-75     | Obesity-related Cancer           | 8 | Event/Total | √ |   |   |
| Lam TK, 2013 <sup>30</sup>       | 2013 | USA            | 158415 | M/F | 50-71     | Lung Cancer                      | 8 | Event/Total | √ | √ |   |
| Patel AV, 2013 <sup>31</sup>     | 2013 | USA            | 152423 | M/F | 50-74     | Diffuse Large B cell<br>Lymphoma | 8 | Event/Total | √ |   |   |
| Renehan AG, 2012 <sup>32</sup>   | 2012 | United Kingdom | 273679 | M/F | 50-71     | Colorectal Cancer                | 8 | Event/Total | √ | √ | √ |
| Smith L, 2012 <sup>33</sup>      | 2012 | USA            | 448732 | M/F | 50-71     | Lung Cancer                      | 9 | Event/Total | √ | √ |   |
| Cecchini RS, 2012 <sup>34</sup>  | 2012 | USA            | 12243  | F   | NA        | Breast Cancer                    | 8 | Event/Total | √ | √ |   |
| Laake I, 2010 <sup>35</sup>      | 2010 | Norway         | 21687  | M/F | 35-49     | Colon Cancer                     | 9 | Event/Total | √ | √ | √ |
| Sawada N, 2010 <sup>36</sup>     | 2010 | Japan          | 99462  | M/F | 40-59     | Kidney Cancer                    | 9 | Event/Total | √ | √ |   |
| Mijovic T, 2009 <sup>37</sup>    | 2009 | Canada         | 253    | M/F | 19-85     | Cancer of Thyroid gland          | 4 | Event/Total | √ | √ |   |
| Rod NH, 2009 <sup>38</sup>       | 2009 | Denmark        | 5054   | F   | 62 (mean) | Breast Cancer                    | 9 | Event/Total | √ | √ | √ |
| Leitzmann MF, 2009 <sup>39</sup> | 2009 | USA            | 94525  | F   | 50-71     | Ovarian Cancer                   | 7 | Event/Total | √ | √ |   |

|                                  |      |             |        |     |             |                                                                                                                                                                                                                                      |   |             |   |   |   |   |   |
|----------------------------------|------|-------------|--------|-----|-------------|--------------------------------------------------------------------------------------------------------------------------------------------------------------------------------------------------------------------------------------|---|-------------|---|---|---|---|---|
| Iwasaki M, 2007 <sup>40</sup>    | 2007 | Japan       | 55537  | F   | 40-69       | Breast Cancer                                                                                                                                                                                                                        | 9 | Event/Total | √ |   |   |   |   |
| Nothlings U, 2007 <sup>41</sup>  | 2007 | USA         | 167430 | M/F | 45-75       | Prostatic Cancer                                                                                                                                                                                                                     | 9 | Event/Total | √ | √ |   | √ |   |
| Rodriguez C, 2007 <sup>42</sup>  | 2007 | USA         | 69991  | M   | 50-74       | Prostatic Cancer                                                                                                                                                                                                                     | 9 | Event/Total | √ | √ |   |   |   |
| N'Kontchou G, 2006 <sup>43</sup> | 2006 | France      | 771    | M/F | 61.4 (mean) | Hepatocellular<br>Carcinoma                                                                                                                                                                                                          | 8 | Event/Total | √ | √ |   |   |   |
| Niwa Y, 2005 <sup>44</sup>       | 2005 | Japan       | 36456  | F   | 40-79       | Ovarian Cancer                                                                                                                                                                                                                       | 8 | Event/Total | √ | √ |   | √ |   |
| Patel AV, 2005 <sup>45</sup>     | 2005 | USA         | 145627 | M/F | 50-74       | Pancreatic Cancer                                                                                                                                                                                                                    | 8 | Event/Total | √ | √ |   |   |   |
| Kuriyama S, 2005 <sup>46</sup>   | 2005 | Japan       | 27539  | M/F | ≥40         | Esophageal Cancer,<br>Gastric Cancer,<br>Colorectal Cancer, Liver<br>Cancer, Gallbladder<br>Cancer, Pancreatic<br>Cancer, Lung Cancer,<br>Kidney Cancer, Breast<br>Cancer, Endometrial<br>Cancer, Cervical Cancer,<br>Ovarian Cancer | 8 | Event/Total | √ | √ |   | √ | √ |
| Lin J, 2004 <sup>47</sup>        | 2004 | USA         | 37671  | M/F | ≥45         | Breast Cancer                                                                                                                                                                                                                        | 8 | Event/Total | √ | √ |   |   |   |
| Moore LL, 2004 <sup>48</sup>     | 2004 | USA         | 7566   | M/F | 30-79       | Colon Cancer                                                                                                                                                                                                                         | 9 | Event/Total | √ | √ |   | √ | √ |
| Park B, 2022 <sup>49</sup>       | 2022 | South Korea | 184931 | F   | ≥40         | Breast Cancer                                                                                                                                                                                                                        | 9 | Event/Total |   |   | √ |   |   |
| Kim SJ, 2021 <sup>50</sup>       | 2021 | Canada      | 3853   | F   | 18          | Ovarian Cancer                                                                                                                                                                                                                       | 7 | Event/Total |   |   | √ |   |   |
| da Silva M, 2018 <sup>51</sup>   | 2018 | Norway      | 80930  | M/F | 30-70       | Breast, Colon, Rectal,<br>Ovarian, Pancreatic,<br>Kidney, Endometrial<br>Cancer                                                                                                                                                      | 9 | Event/Total |   |   | √ |   |   |



|                                   |      |                                |         |     |             |                                                                                                                                                                                                                                       |   |             |   |   |   |
|-----------------------------------|------|--------------------------------|---------|-----|-------------|---------------------------------------------------------------------------------------------------------------------------------------------------------------------------------------------------------------------------------------|---|-------------|---|---|---|
| Chadid S, 2018 <sup>52</sup>      | 2018 | USA                            | 3850    | M/F | ≥60         | Female reproductive (postmenopausal, Breast, Uterine/Endometrial and Ovarian), Colon, Rectum, Stomach, Liver, Gallbladder, Pancreas, Kidney, Thyroid, Esophageal Adenocarcinoma, Leukaemia, Non Hodgkin Lymphoma and Multiple Myeloma | 7 | Event/Total | √ |   |   |
| Kim SJ, 2018 <sup>53</sup>        | 2018 | Canada & Poland                | 3493    | F   | 18          | Breast Cancer                                                                                                                                                                                                                         | 7 | Event/Total | √ |   |   |
| Rosner B, 2017 <sup>54</sup>      | 2017 | USA                            | 74177   | F   | 30-55       | Breast Cancer                                                                                                                                                                                                                         | 7 | Event/Total | √ |   |   |
| Alsaker MD, 2013 <sup>55</sup>    | 2013 | Norway                         | 28153   | F   | ≥20         | Breast Cancer                                                                                                                                                                                                                         | 9 | Event/Total | √ |   |   |
| Chamberlain C, 2011 <sup>56</sup> | 2011 | United Kingdom                 | 20991   | M   | ≥20         | Prostatic Cancer                                                                                                                                                                                                                      | 9 | Event/Total | √ |   |   |
| Bassett JK, 2010 <sup>57</sup>    | 2010 | Australia                      | 39626   | M/F | 40-69       | Colon Cancer                                                                                                                                                                                                                          | 9 | Event/Total | √ |   |   |
| Thygesen LC, 2008 <sup>58</sup>   | 2008 | USA                            | 46349   | F   | 40-75       | Colon Cancer(male)                                                                                                                                                                                                                    | 8 | Event/Total | √ |   |   |
| Klintman M, 2022 <sup>59</sup>    | 2022 | Sweden                         | 35412   | F   | 62 (median) | Breast Cancer                                                                                                                                                                                                                         | 7 | Event/Total | √ | √ | √ |
| Shao F, 2022 <sup>60</sup>        | 2022 | the People's Republic of China | 450482  | M/F | 40-69       | Lung Cancer                                                                                                                                                                                                                           | 8 | Event/Total | √ | √ |   |
| Song H, 2022 <sup>61</sup>        | 2022 | Korea                          | 40432   | F   | ≥40         | Breast Cancer                                                                                                                                                                                                                         | 7 | Event/Total | √ | √ | √ |
| Urbute A, 2022 <sup>62</sup>      | 2022 | Denmark                        | 461646  | F   | ≤49         | Ovarian Cancer                                                                                                                                                                                                                        | 7 | Event/Total | √ | √ | √ |
| Park B, 2022 <sup>63</sup>        | 2022 | Korea                          | 6097686 | F   | ≥40         | Endometrial Cancer                                                                                                                                                                                                                    | 7 | Event/Total | √ | √ | √ |

|                             |      |                                |         |     |       |                                    |   |             |   |   |   |
|-----------------------------|------|--------------------------------|---------|-----|-------|------------------------------------|---|-------------|---|---|---|
| Yang W, 2022 <sup>64</sup>  | 2022 | the People's Republic of China | 138 922 | M/F | 20-50 | Liver Cancer, Biliary Tract Cancer | 8 | Event/Total | √ | √ | √ |
| Choi IY, 2021 <sup>65</sup> | 2021 | Korea                          | 6272367 | M/F | ≥40   | Gastric Cancer                     | 9 | Event/Total | √ | √ | √ |
| Shin CM, 2017 <sup>66</sup> | 2017 | Korea                          | 408931  | M/F | ≥20   | Colorectal Cancer                  | 7 | Event/Total | √ | √ | √ |

Abbreviation: M, male; F, female; NA, not available; HR, hazard ratio.

1. Pasqual E, O'Brien K, Rinaldi S, Sandler DP, Kitahara CM. Obesity, obesity-related metabolic conditions, and risk of thyroid cancer in women: results from a prospective cohort study (Sister Study). *The Lancet Regional Health - Americas*. 2023;23doi:10.1016/j.lana.2023.100537
2. Safizadeh F, Mandic M, Pulte D, Niedermaier T, Hoffmeister M, Brenner H. The underestimated impact of excess body weight on colorectal cancer risk: Evidence from the UK Biobank cohort. *British Journal of Cancer*. 2023;doi:10.1038/s41416-023-02351-6
3. Nguyen DN, Kim JH, Kim MK. Association of Metabolic Health and Central Obesity with the Risk of Thyroid Cancer: Data from the Korean Genome and Epidemiology Study. *Cancer Epidemiol Biomarkers Prev*. Mar 1 2022;31(3):543-553. doi:10.1158/1055-9965.EPI-21-0255
4. Lee HW, Huang D, Shin WK, et al. Obesity at early adulthood increases risk of gastric cancer from the Health Examinees-Gem (HEXA-G) study. *PLoS One*. 2022;17(2):e0260826. doi:10.1371/journal.pone.0260826
5. Mao D, Lau ESH, Wu H, et al. Risk Associations of Glycemic Burden and Obesity With Liver Cancer-A 10-Year Analysis of 15,280 Patients With Type 2 Diabetes. *Hepatol Commun*. Jun 2022;6(6):1350-1360. doi:10.1002/hep4.1891
6. Miyata H, Shirai K, Muraki I, Iso H, Tamakoshi A. Associations of Body Mass Index, Weight Change, Physical Activity, and Sedentary Behavior With Endometrial Cancer Risk Among Japanese Women: The Japan Collaborative Cohort Study. *J Epidemiol*. Dec 5 2021;31(12):621-627. doi:10.2188/jea.JE20200145
7. Abe SK, Narita S, Saito E, et al. Body Mass Index, Height, Weight Change, and Subsequent Lung Cancer Risk: The Japan Public Health Center-Based Prospective Study. *Cancer Epidemiol Biomarkers Prev*. Sep 2021;30(9):1708-1716. doi:10.1158/1055-9965.EPI-21-0195
8. Smith SG, Sestak I, Morris MA, et al. The impact of body mass index on breast cancer incidence among women at increased risk: an observational study from the International Breast Intervention Studies. *Breast Cancer Res Treat*. Jul 2021;188(1):215-223. doi:10.1007/s10549-021-06141-7
9. Baumeister SE, Schlecht I, Trabert B, Nolde M, Meisinger C, Leitzmann MF. Anthropometric risk factors for ovarian cancer in the NIH-AARP Diet and Health Study. *Cancer Causes Control*. Mar 2021;32(3):231-239. doi:10.1007/s10552-020-01377-y
10. Maliniak ML, Gapstur SM, McCullough LE, et al. Joint associations of physical activity and body mass index with the risk of established excess body

fatness-related cancers among postmenopausal women. *Cancer Causes Control*. Feb 2021;32(2):127-138. doi:10.1007/s10552-020-01365-2

11. Sanikini H, Muller DC, Chadeau-Hyam M, Murphy N, Gunter MJ, Cross AJ. Anthropometry, body fat composition and reproductive factors and risk of oesophageal and gastric cancer by subtype and subsite in the UK Biobank cohort. *PLoS One*. 2020;15(10):e0240413. doi:10.1371/journal.pone.0240413

12. Luo J, Chen X, Manson JE, et al. Birth weight, weight over the adult life course and risk of breast cancer. *Int J Cancer*. Jul 1 2020;147(1):65-75. doi:10.1002/ijc.32710

13. Minami CA, Zabor EC, Gilbert E, et al. Do Body Mass Index and Breast Density Impact Cancer Risk Among Women with Lobular Carcinoma In Situ? *Ann Surg Oncol*. Jun 2020;27(6):1844-1851. doi:10.1245/s10434-019-08126-9

14. Renehan AG, Pegington M, Harvie MN, et al. Young adulthood body mass index, adult weight gain and breast cancer risk: the PROCAS Study (United Kingdom). *Br J Cancer*. May 2020;122(10):1552-1561. doi:10.1038/s41416-020-0807-9

15. Sanikini H, Muller DC, Sophiea M, et al. Anthropometric and reproductive factors and risk of esophageal and gastric cancer by subtype and subsite: Results from the European Prospective Investigation into Cancer and Nutrition (EPIC) cohort. *Int J Cancer*. Feb 15 2020;146(4):929-942. doi:10.1002/ijc.32386

16. Everatt R, Virviciute D, Tamosiunas A. Body mass index and other risk factors for kidney cancer in men: a cohort study in Lithuania. *Cent Eur J Public Health*. Dec 2019;27(4):272-278. doi:10.21101/cejph.a5080

17. Hirabayashi M, Inoue M, Sawada N, et al. Effect of body-mass index on the risk of gastric cancer: A population-based cohort study in A Japanese population. *Cancer Epidemiol*. Dec 2019;63:101622. doi:10.1016/j.canep.2019.101622

18. Kawachi A, Shimazu T, Budhathoki S, et al. Association of BMI and height with the risk of endometrial cancer, overall and by histological subtype: a population-based prospective cohort study in Japan. *Eur J Cancer Prev*. May 2019;28(3):196-202. doi:10.1097/CEJ.0000000000000449

19. Wakamatsu M, Sugawara Y, Zhang S, Tanji F, Tomata Y, Tsuji I. Weight change since age 20 and incident risk of obesity-related cancer in Japan: a pooled analysis of the Miyagi Cohort Study and the Ohsaki Cohort Study. *Int J Cancer*. Mar 1 2019;144(5):967-980. doi:10.1002/ijc.31743

20. Zohar L, Rottenberg Y, Twig G, et al. Adolescent overweight and obesity and the risk for pancreatic cancer among men and women: a nationwide study of 1.79 million Israeli adolescents. *Cancer*. Jan 1 2019;125(1):118-126. doi:10.1002/cncr.31764

21. Schoemaker MJ, Nichols HB, Wright LB, et al. Association of Body Mass Index and Age With Subsequent Breast Cancer Risk in Premenopausal Women. *JAMA Oncol*. Nov 1 2018;4(11):e181771. doi:10.1001/jamaoncol.2018.1771

22. Xu HL, Zhang ML, Yan YJ, et al. Body mass index and cancer risk among Chinese patients with type 2 diabetes mellitus. *BMC Cancer*. Aug 6 2018;18(1):795. doi:10.1186/s12885-018-4675-0

23. Dickerman BA, Ahearn TU, Giovannucci E, et al. Weight change, obesity and risk of prostate cancer progression among men with clinically localized prostate cancer. *Int J Cancer*. Sep 1 2017;141(5):933-944. doi:10.1002/ijc.30803

24. Leiba A, Duek A, Afek A, Derazne E, Leiba M. Obesity and related risk of myeloproliferative neoplasms among Israeli adolescents. *Obesity (Silver Spring)*. Jul 2017;25(7):1187-1190. doi:10.1002/oby.21863
25. Yamamoto-Honda R, Takahashi Y, Yoshida Y, et al. Body mass index and the risk of cancer incidence in patients with type 2 diabetes in Japan: Results from the National Center Diabetes Database. *J Diabetes Investig*. Nov 2016;7(6):908-914. doi:10.1111/jdi.12522
26. Sponholtz TR, Palmer JR, Rosenberg L, Hatch EE, Adams-Campbell LL, Wise LA. Body Size, Metabolic Factors, and Risk of Endometrial Cancer in Black Women. *Am J Epidemiol*. Feb 15 2016;183(4):259-68. doi:10.1093/aje/kwv186
27. White AJ, Nichols HB, Bradshaw PT, Sandler DP. Overall and central adiposity and breast cancer risk in the Sister Study. *Cancer*. Oct 15 2015;121(20):3700-8. doi:10.1002/cncr.29552
28. Moller H, Roswall N, Van Hemelrijck M, et al. Prostate cancer incidence, clinical stage and survival in relation to obesity: a prospective cohort study in Denmark. *Int J Cancer*. Apr 15 2015;136(8):1940-7. doi:10.1002/ijc.29238
29. de Mutsert R, Sun Q, Willett WC, Hu FB, van Dam RM. Overweight in early adulthood, adult weight change, and risk of type 2 diabetes, cardiovascular diseases, and certain cancers in men: a cohort study. *Am J Epidemiol*. Jun 1 2014;179(11):1353-65. doi:10.1093/aje/kwu052
30. Lam TK, Moore SC, Brinton LA, et al. Anthropometric measures and physical activity and the risk of lung cancer in never-smokers: a prospective cohort study. *PLoS One*. 2013;8(8):e70672. doi:10.1371/journal.pone.0070672
31. Patel AV, Diver WR, Teras LR, Birmann BM, Gapstur SM. Body mass index, height and risk of lymphoid neoplasms in a large United States cohort. *Leuk Lymphoma*. Jun 2013;54(6):1221-7. doi:10.3109/10428194.2012.742523
32. Renehan AG, Flood A, Adams KF, et al. Body mass index at different adult ages, weight change, and colorectal cancer risk in the National Institutes of Health-AARP Cohort. *Am J Epidemiol*. Dec 15 2012;176(12):1130-40. doi:10.1093/aje/kws192
33. Smith L, Brinton LA, Spitz MR, et al. Body mass index and risk of lung cancer among never, former, and current smokers. *J Natl Cancer Inst*. May 16 2012;104(10):778-89. doi:10.1093/jnci/djs179
34. Cecchini RS, Costantino JP, Cauley JA, et al. Body mass index and the risk for developing invasive breast cancer among high-risk women in NSABP P-1 and STAR breast cancer prevention trials. *Cancer Prev Res (Phila)*. Apr 2012;5(4):583-92. doi:10.1158/1940-6207.CAPR-11-0482
35. Laake I, Thune I, Selmer R, Tretli S, Slattery ML, Veierod MB. A prospective study of body mass index, weight change, and risk of cancer in the proximal and distal colon. *Cancer Epidemiol Biomarkers Prev*. Jun 2010;19(6):1511-22. doi:10.1158/1055-9965.EPI-09-0813
36. Sawada N, Inoue M, Sasazuki S, et al. Body mass index and subsequent risk of kidney cancer: a prospective cohort study in Japan. *Ann Epidemiol*. Jun 2010;20(6):466-72. doi:10.1016/j.annepidem.2010.03.008
37. Mijovic T, How J, Pakdaman M, et al. Body mass index in the evaluation of thyroid cancer risk. *Thyroid*. May 2009;19(5):467-72. doi:10.1089/thy.2008.0386

38. Rod NH, Hansen AM, Nielsen J, Schnohr P, Gronbaek M. Low-risk factor profile, estrogen levels, and breast cancer risk among postmenopausal women. *Int J Cancer*. Apr 15 2009;124(8):1935-40. doi:10.1002/ijc.24136
39. Leitzmann MF, Koebnick C, Danforth KN, et al. Body mass index and risk of ovarian cancer. *Cancer*. Feb 15 2009;115(4):812-22. doi:10.1002/cncr.24086
40. Iwasaki M, Otani T, Inoue M, Sasazuki S, Tsugane S, Japan Public Health Center-Based Prospective Study G. Body size and risk for breast cancer in relation to estrogen and progesterone receptor status in Japan. *Ann Epidemiol*. Apr 2007;17(4):304-12. doi:10.1016/j.annepidem.2006.09.003
41. Nothlings U, Wilkens LR, Murphy SP, Hankin JH, Henderson BE, Kolonel LN. Body mass index and physical activity as risk factors for pancreatic cancer: the Multiethnic Cohort Study. *Cancer Causes Control*. Mar 2007;18(2):165-75. doi:10.1007/s10552-006-0100-0
42. Rodriguez C, Freedland SJ, Deka A, et al. Body mass index, weight change, and risk of prostate cancer in the Cancer Prevention Study II Nutrition Cohort. *Cancer Epidemiol Biomarkers Prev*. Jan 2007;16(1):63-9. doi:10.1158/1055-9965.EPI-06-0754
43. N'Kontchou G, Paries J, Htar MT, et al. Risk factors for hepatocellular carcinoma in patients with alcoholic or viral C cirrhosis. *Clin Gastroenterol Hepatol*. Aug 2006;4(8):1062-8. doi:10.1016/j.cgh.2006.05.013
44. Niwa Y, Yatsuya H, Tamakoshi K, et al. Relationship between body mass index and the risk of ovarian cancer in the Japanese population: findings from the Japanese Collaborate Cohort (JACC) study. *J Obstet Gynaecol Res*. Oct 2005;31(5):452-8. doi:10.1111/j.1447-0756.2005.00319.x
45. Patel AV, Rodriguez C, Bernstein L, Chao A, Thun MJ, Calle EE. Obesity, recreational physical activity, and risk of pancreatic cancer in a large U.S. Cohort. *Cancer Epidemiol Biomarkers Prev*. Feb 2005;14(2):459-66. doi:10.1158/1055-9965.EPI-04-0583
46. Kuriyama S, Tsubono Y, Hozawa A, et al. Obesity and risk of cancer in Japan. *Int J Cancer*. Jan 1 2005;113(1):148-57. doi:10.1002/ijc.20529
47. Lin J, Zhang SM, Cook NR, Rexrode KM, Lee IM, Buring JE. Body mass index and risk of colorectal cancer in women (United States). *Cancer Causes Control*. Aug 2004;15(6):581-9. doi:10.1023/B:CACO.0000036168.23351.f1
48. Moore LL, Bradlee ML, Singer MR, et al. BMI and waist circumference as predictors of lifetime colon cancer risk in Framingham Study adults. *Int J Obes Relat Metab Disord*. Apr 2004;28(4):559-67. doi:10.1038/sj.ijo.0802606
49. Park B. Changes in weight and waist circumference during menopausal transition and postmenopausal breast cancer risk. *Int J Cancer*. May 1 2022;150(9):1431-1438. doi:10.1002/ijc.33906
50. Kim SJ, Lubinski J, Huzarski T, et al. Weight Gain and the Risk of Ovarian Cancer in BRCA1 and BRCA2 Mutation Carriers. *Cancer Epidemiol Biomarkers Prev*. Nov 2021;30(11):2038-2043. doi:10.1158/1055-9965.EPI-21-0296
51. da Silva M, Weiderpass E, Licaj I, Lissner L, Rylander C. Excess body weight, weight gain and obesity-related cancer risk in women in Norway: the Norwegian Women and Cancer study. *Br J Cancer*. Aug 2018;119(5):646-656. doi:10.1038/s41416-018-0240-5
52. Chadid S, Singer MR, Kreger BE, Bradlee ML, Moore LL. Midlife weight gain is a risk factor for obesity-related cancer. *Br J Cancer*. Jun 2018;118(12):1665-1671. doi:10.1038/s41416-018-0106-x

53. Kim SJ, Huzarski T, Gronwald J, et al. Prospective evaluation of body size and breast cancer risk among BRCA1 and BRCA2 mutation carriers. *Int J Epidemiol*. Jun 1 2018;47(3):987-997. doi:10.1093/ije/dyy039
54. Rosner B, Eliassen AH, Toriola AT, et al. Weight and weight changes in early adulthood and later breast cancer risk. *Int J Cancer*. May 1 2017;140(9):2003-2014. doi:10.1002/ijc.30627
55. Alsaker MD, Janszky I, Opdahl S, Vatten LJ, Romundstad PR. Weight change in adulthood and risk of postmenopausal breast cancer: the HUNT study of Norway. *Br J Cancer*. Sep 3 2013;109(5):1310-7. doi:10.1038/bjc.2013.403
56. Chamberlain C, Romundstad P, Vatten L, Gunnell D, Martin RM. The association of weight gain during adulthood with prostate cancer incidence and survival: a population-based cohort. *Int J Cancer*. Sep 1 2011;129(5):1199-206. doi:10.1002/ijc.25739
57. Bassett JK, Severi G, English DR, et al. Body size, weight change, and risk of colon cancer. *Cancer Epidemiol Biomarkers Prev*. Nov 2010;19(11):2978-86. doi:10.1158/1055-9965.EPI-10-0543
58. Thygesen LC, Gronbaek M, Johansen C, Fuchs CS, Willett WC, Giovannucci E. Prospective weight change and colon cancer risk in male US health professionals. *Int J Cancer*. Sep 1 2008;123(5):1160-5. doi:10.1002/ijc.23612
59. Klintman M, Rosendahl AH, Randeris B, et al. Postmenopausal overweight and breast cancer risk; results from the KARMA cohort. *Breast Cancer Res Treat*. Nov 2022;196(1):185-196. doi:10.1007/s10549-022-06664-7
60. Shao F, Chen Y, Xu H, et al. Metabolic Obesity Phenotypes and Risk of Lung Cancer: A Prospective Cohort Study of 450,482 UK Biobank Participants. *Nutrients*. Aug 17 2022;14(16)doi:10.3390/nu14163370
61. Song H, Jeong A, Tran TXM, Lee J, Kim M, Park B. Association between Micronutrient Intake and Breast Cancer Risk According to Body Mass Index in South Korean Adult Women: A Cohort Study. *Nutrients*. Jun 26 2022;14(13)doi:10.3390/nu14132644
62. Urbute A, Frederiksen K, Kjaer SK. Early adulthood overweight and obesity and risk of premenopausal ovarian cancer, and premenopausal breast cancer including receptor status: prospective cohort study of nearly 500,000 Danish women. *Ann Epidemiol*. Jun 2022;70:61-67. doi:10.1016/j.annepidem.2022.03.013
63. Park B. Associations between obesity, metabolic syndrome, and endometrial cancer risk in East Asian women. *J Gynecol Oncol*. Jul 2022;33(4):e35. doi:10.3802/jgo.2022.33.e35
64. Yang W, Zeng X, Petrick JL, et al. Body mass index trajectories, weight gain and risks of liver and biliary tract cancers. *JNCI Cancer Spectr*. Aug 12 2022;6(4)doi:10.1093/jncics/pkac056
65. Choi IY, Choi YJ, Shin DW, et al. Association between obesity and the risk of gastric cancer in premenopausal and postmenopausal women: A nationwide cohort study. *J Gastroenterol Hepatol*. Oct 2021;36(10):2834-2840. doi:10.1111/jgh.15558
66. Shin CM, Han K, Lee DH, et al. Association Among Obesity, Metabolic Health, and the Risk for Colorectal Cancer in the General Population in Korea

Using the National Health Insurance Service-National Sample Cohort. *Dis Colon Rectum*. Nov 2017;60(11):1192-1200.  
doi:10.1097/DCR.0000000000000876

Figure S1. The result of the quality of the included studies assessed by the Newcastle-Ottawa Scale

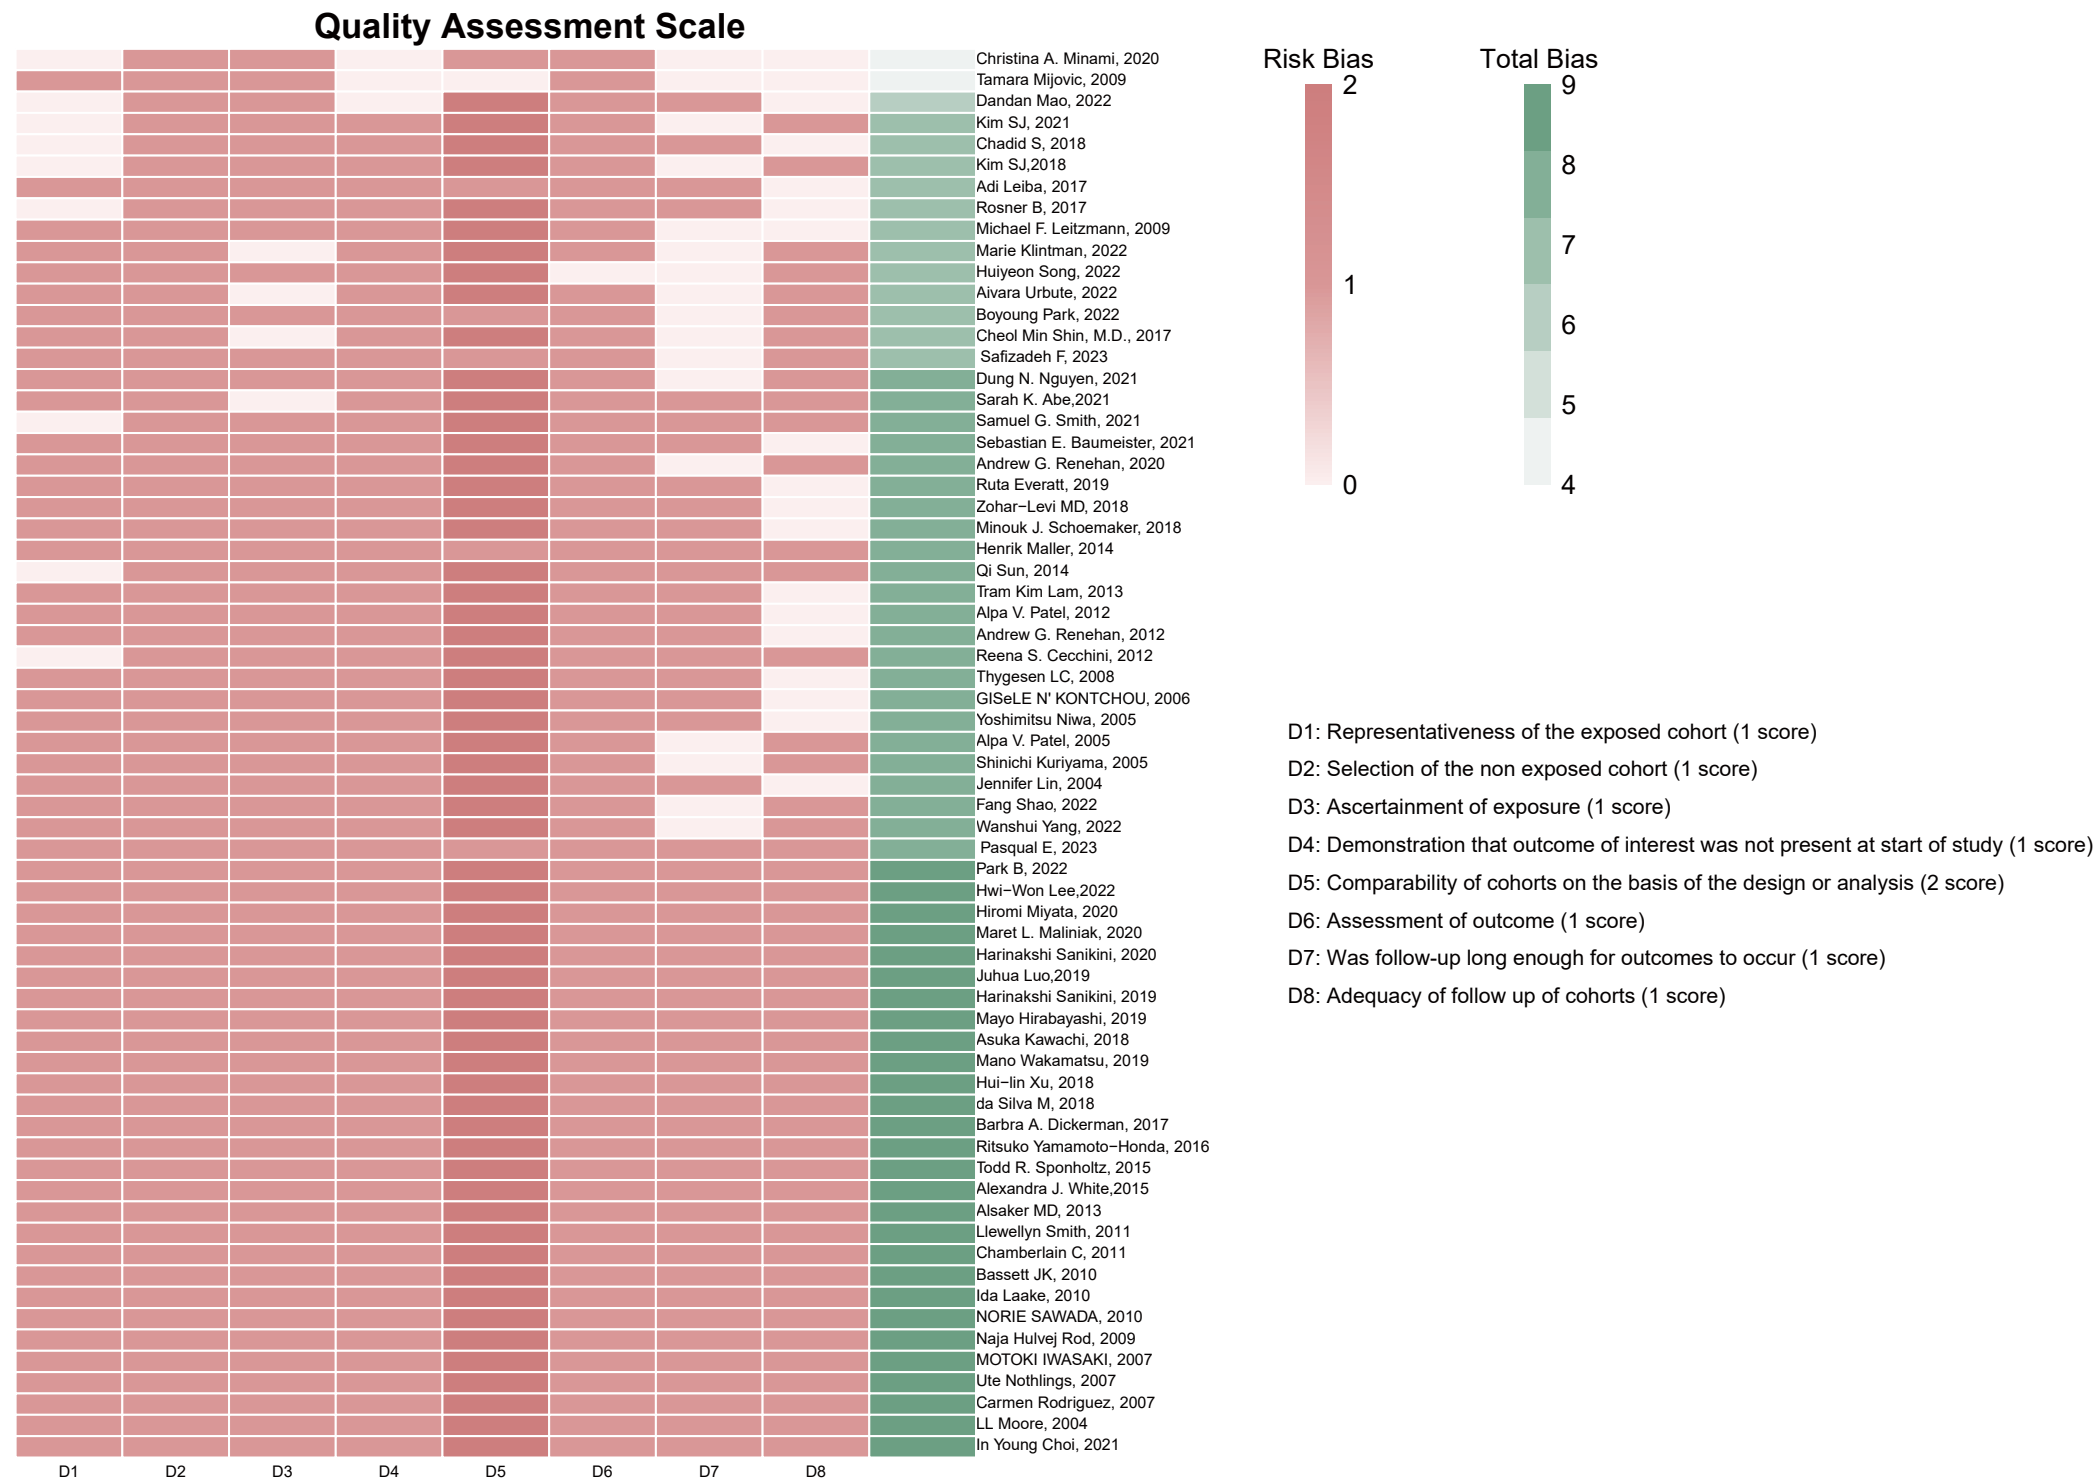



Figure S2: Forest plots of the studies(pooling the HRs) analyzing the risk of overall cancer.

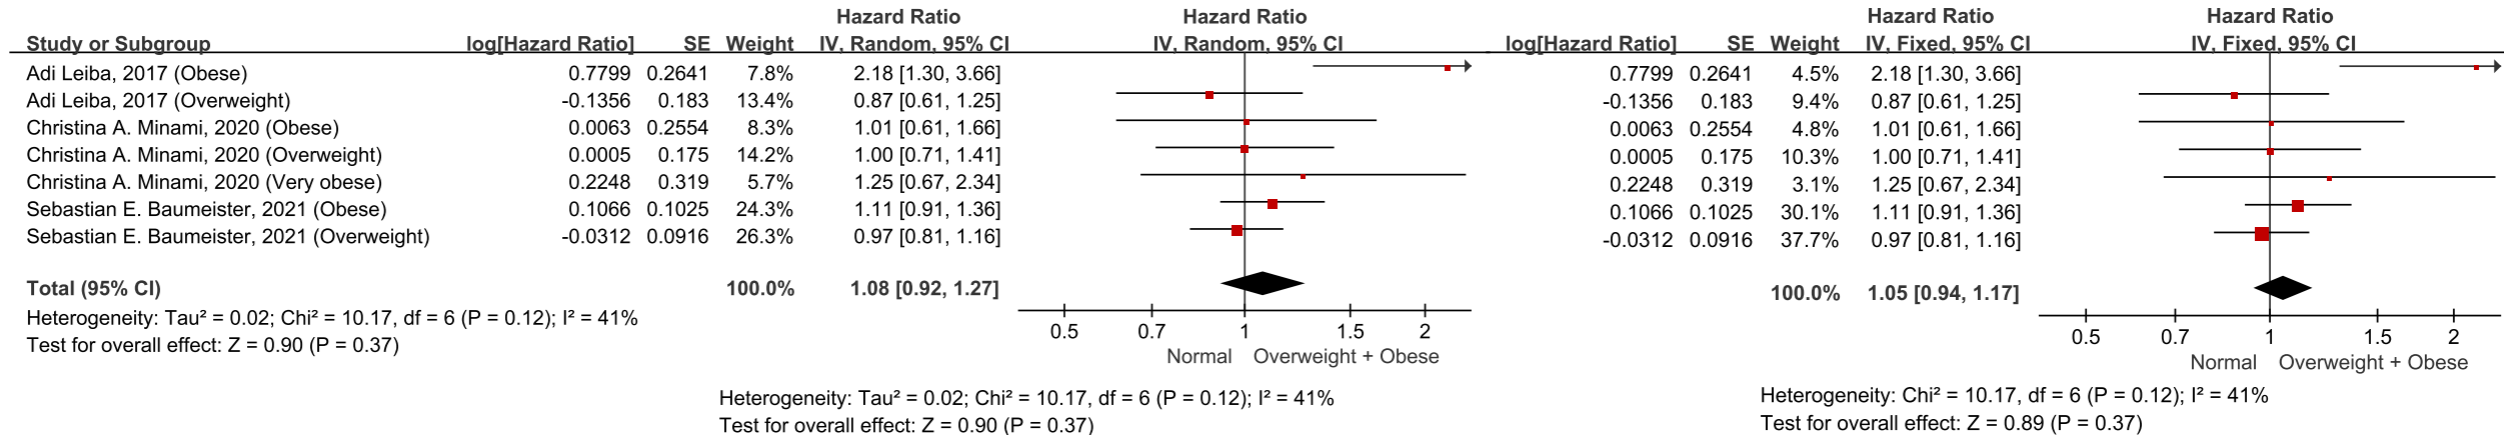

Figure S3. Summary risk estimated by different BMI comparisons in Panel A. digestive system cancer and Panel B. female reproductive system cancer. Abbreviations: RR, relative risk; CI, confidence interval.

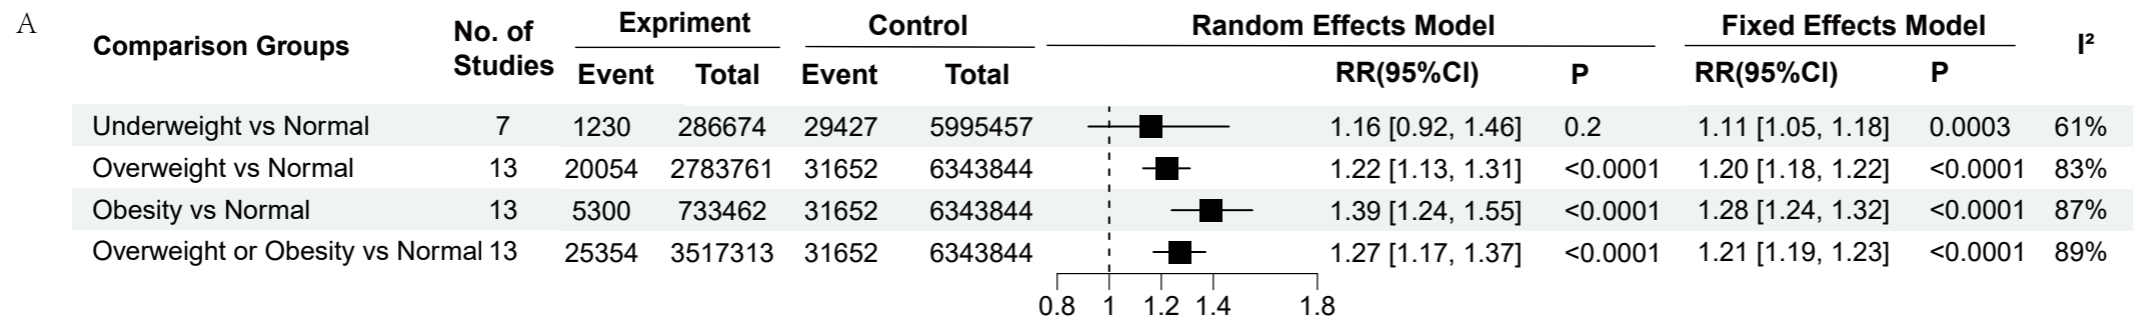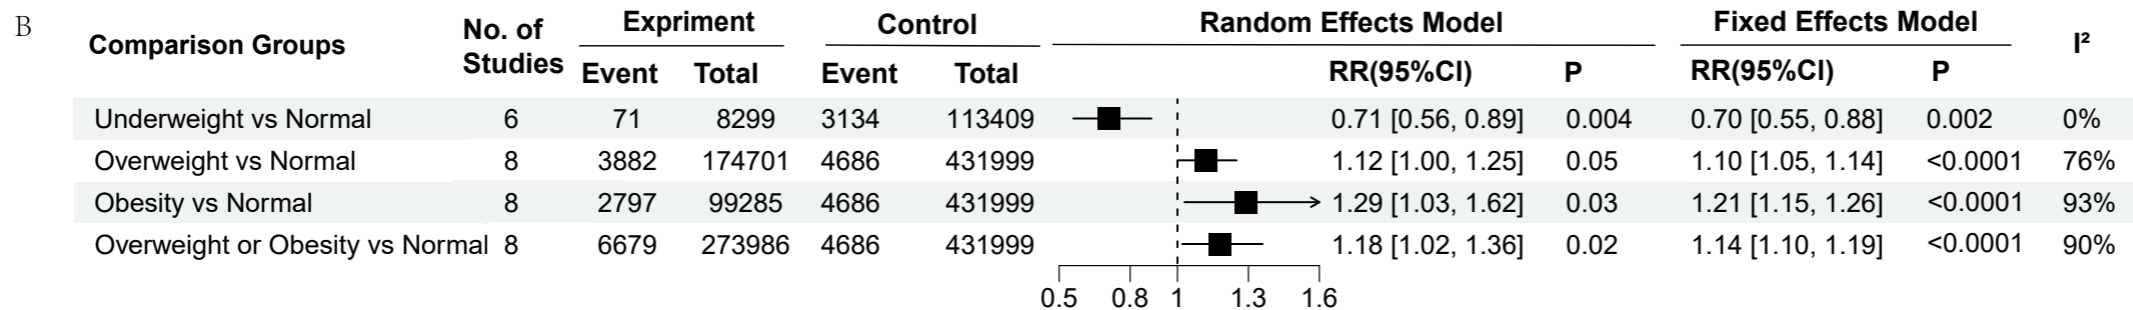

Figure S4. Summary risk of colorectal cancer estimated by different BMI comparisons in men and women.

Abbreviations: RR, relative risk; CI, confidence interval.

| Comparison Groups and Sex                      | No. of Studies | Expriment |        | Control |        | I <sup>2</sup> | Random Effects Model |                   |                | Subgroup Differences |           | Fixed Effects Model |                | Subgroup Differences |      |
|------------------------------------------------|----------------|-----------|--------|---------|--------|----------------|----------------------|-------------------|----------------|----------------------|-----------|---------------------|----------------|----------------------|------|
|                                                |                | Event     | Total  | Event   | Total  |                | RR(95%CI)            | P                 | I <sup>2</sup> | P                    | RR(95%CI) | P                   | I <sup>2</sup> | P                    |      |
| Underweight or Normal vs Overweight or Obesity |                |           |        |         |        |                |                      |                   |                |                      |           |                     |                |                      |      |
| Men                                            | 5              | 2470      | 141626 | 1127    | 83134  | 68%            |                      | 1.30 [1.06, 1.59] | 0.01           | 0%                   | 0.63      | 1.21 [1.13, 1.30]   | <0.0001        | 0%                   | 0.37 |
| Women                                          | 5              | 1068      | 78084  | 883     | 84453  | 81%            |                      | 1.41 [1.08, 1.86] | 0.01           |                      |           | 1.28 [1.17, 1.40]   | <0.0001        |                      |      |
| Overweight vs Normal                           |                |           |        |         |        |                |                      |                   |                |                      |           |                     |                |                      |      |
| Men                                            | 4              | 1615      | 121415 | 872     | 81452  | 46%            |                      | 1.30 [1.11, 1.51] | 0.0008         | 0%                   | 0.79      | 1.25 [1.15, 1.36]   | <0.0001        | 0%                   | 0.74 |
| Women                                          | 4              | 576       | 49815  | 744     | 82735  | 62%            |                      | 1.34 [1.09, 1.64] | 0.005          |                      |           | 1.28 [1.15, 1.43]   | <0.0001        |                      |      |
| Obesity vs Normal                              |                |           |        |         |        |                |                      |                   |                |                      |           |                     |                |                      |      |
| Men                                            | 4              | 322       | 19612  | 872     | 81452  | 73%            |                      | 1.68 [1.19, 2.39] | 0.003          | 0%                   | 0.85      | 1.50 [1.32, 1.70]   | <0.0001        | 0%                   | 0.35 |
| Women                                          | 4              | 328       | 27976  | 744     | 82735  | 89%            |                      | 1.78 [1.10, 2.87] | 0.02           |                      |           | 1.37 [1.21, 1.56]   | <0.0001        |                      |      |
| Overweight or Obesity vs Normal                |                |           |        |         |        |                |                      |                   |                |                      |           |                     |                |                      |      |
| Men                                            | 4              | 1937      | 141027 | 872     | 81452  | 62%            |                      | 1.35 [1.13, 1.61] | 0.001          | 0%                   | 0.72      | 1.29 [1.19, 1.40]   | <0.0001        | 0%                   | 0.69 |
| Women                                          | 4              | 2841      | 218818 | 1616    | 164187 | 83%            |                      | 1.43 [1.09, 1.88] | 0.009          |                      |           | 1.33 [1.20, 1.46]   | <0.0001        |                      |      |

0.8 1 1.2 1.4 1.8 2

Figure S5. Funnel Plots. Panel A. Overweight vs. Normal Weight; Panel B. Overweight or Obesity vs. Normal Weight; Panel C. Overweight or Obesity vs. Underweight or Normal Weight; Panel D. Obesity vs. Normal Weight; Panel E. Weight Gain vs. Weight Loss; Panel F. Weight Gain vs. Weight Loss; Panel F. Underweight vs. Normal Weight.

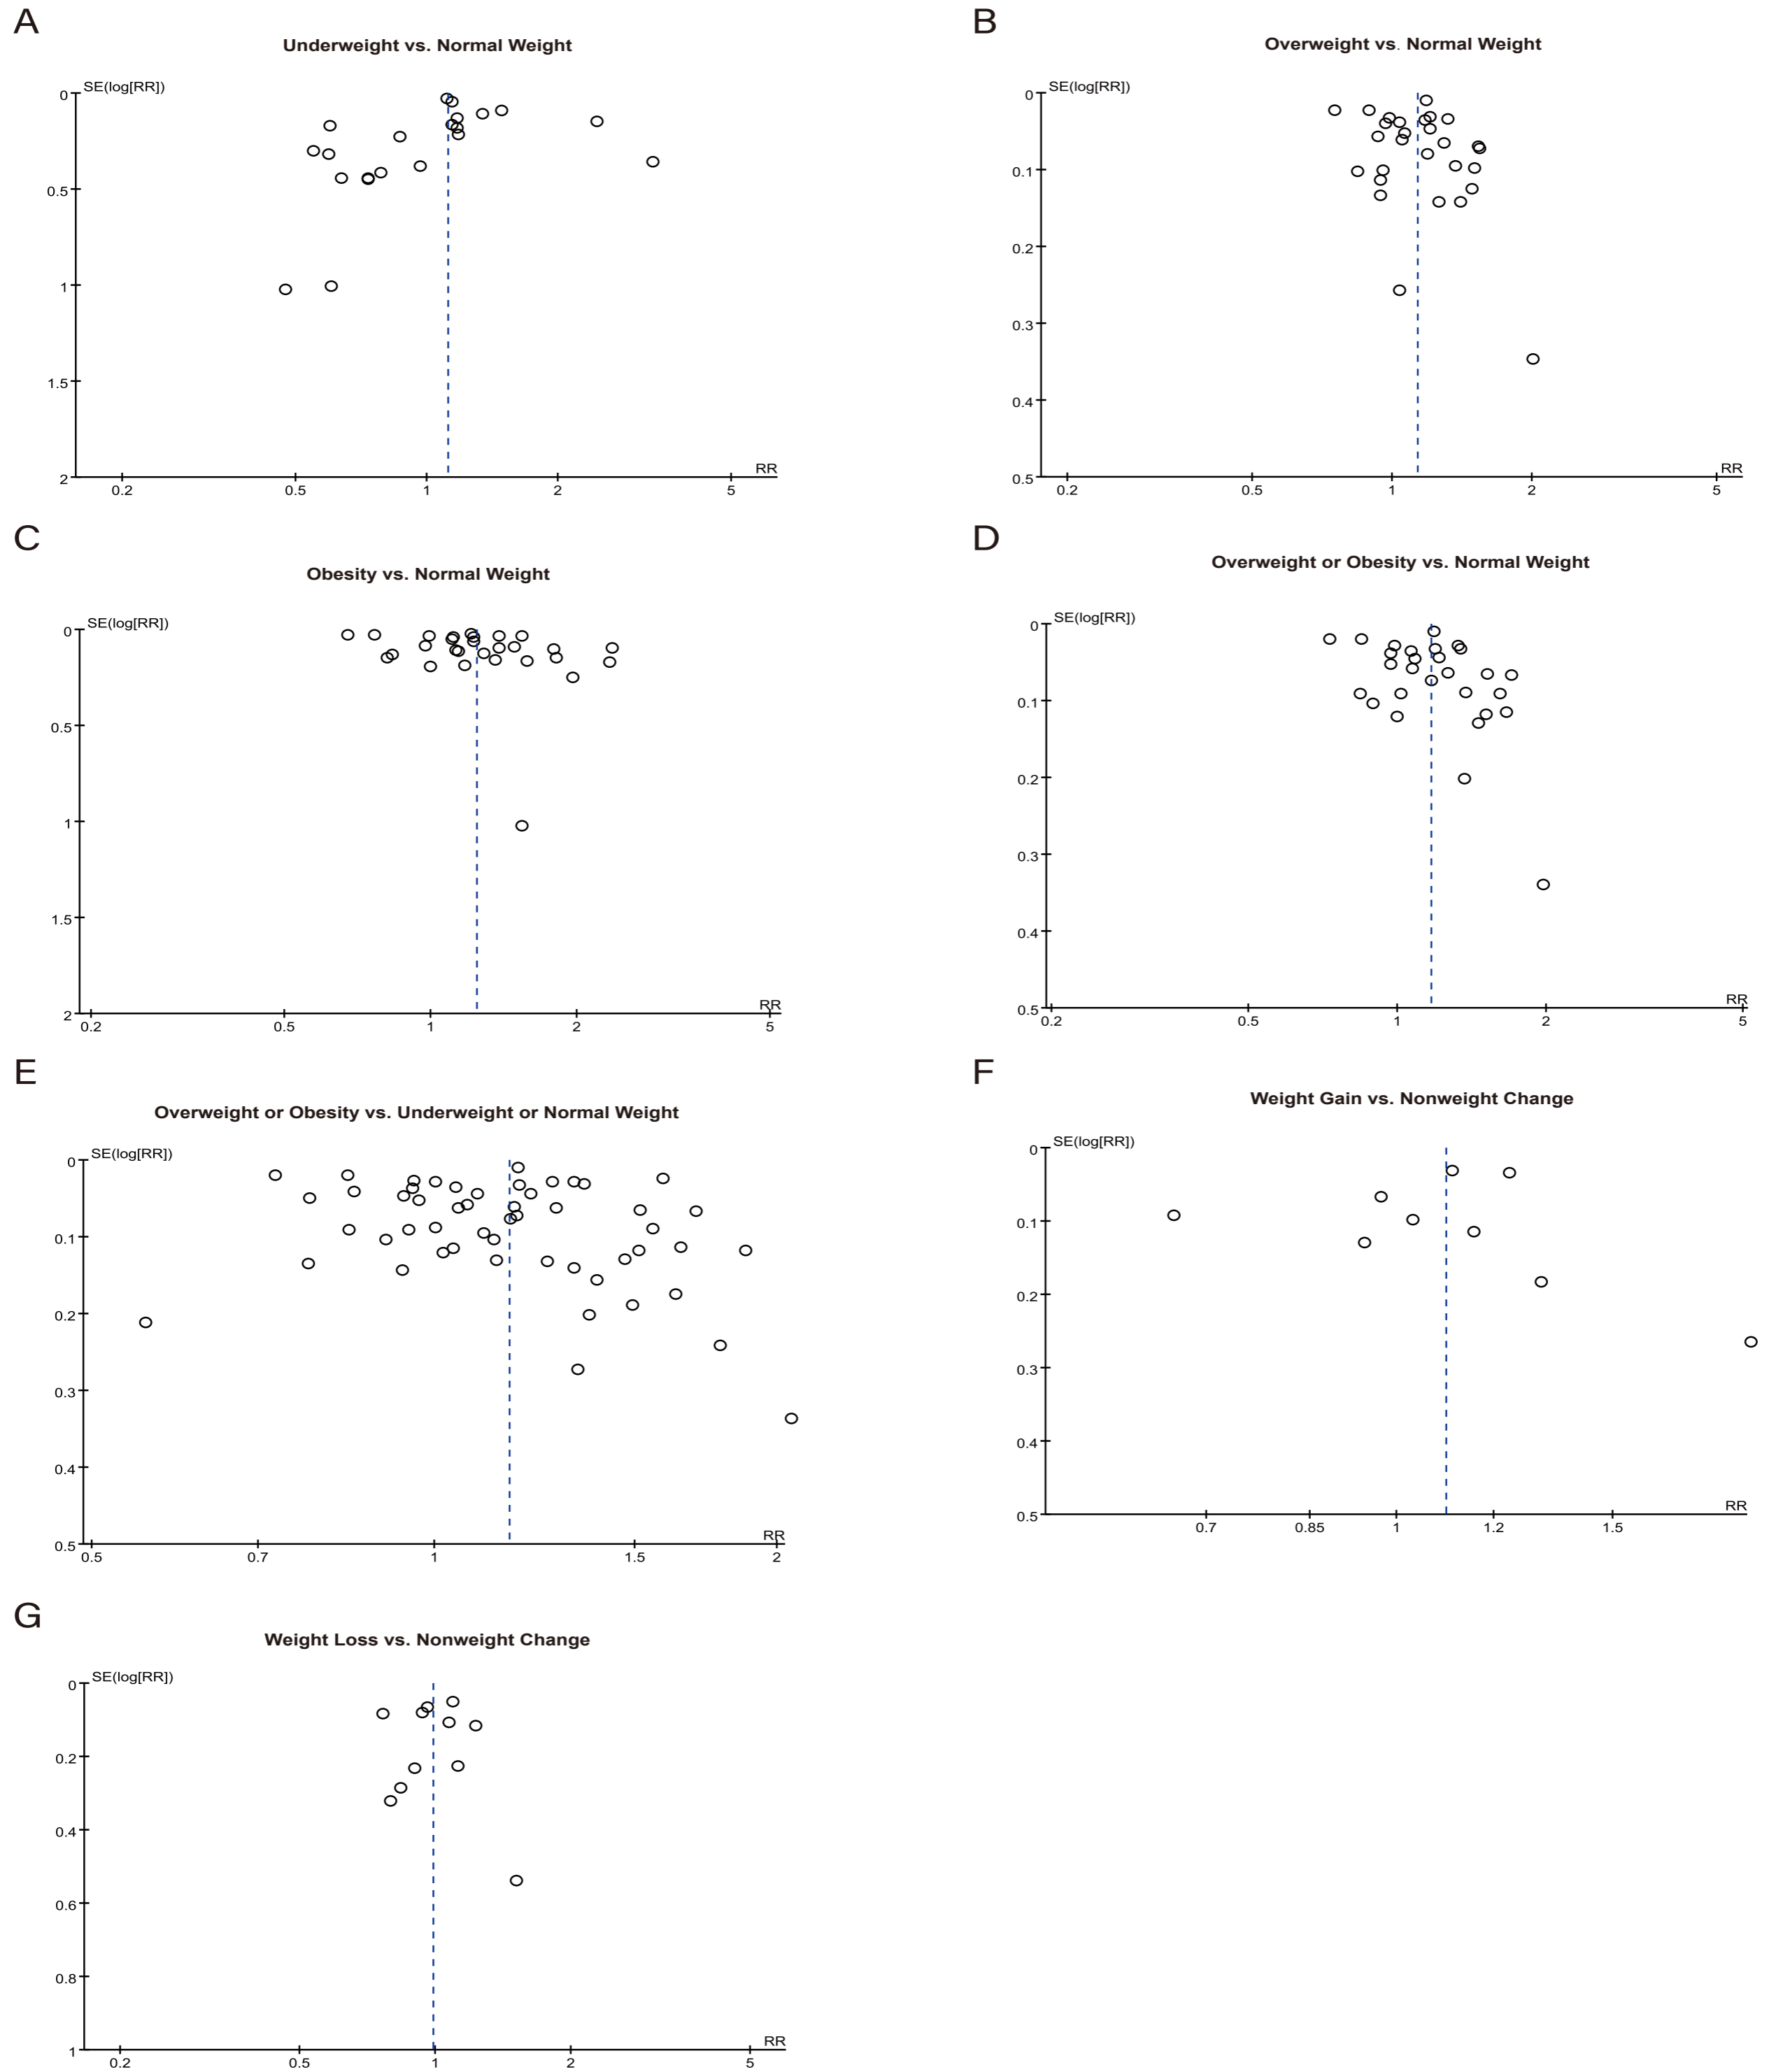

Supplement: jogh-14-04067-s001.pdf [file jogh-14-04067-s001.pdf]
